# Supplementary material
Source: PubMed Central journal article supplement (PMC6702107)
Supplement: NIHMS1523272-supplement-1.pdf [file NIHMS1523272-supplement-1.pdf]

**Supplemental Table 1.** All regions of the brain demonstrating significantly greater activation in response to trials on which a valuable distractor was presented compared to distractor-absent trials, specifically when the target was presented in the visual field contralateral to the distractor. RVF = right visual field; LVF = left visual field. x,y,z refer to the Talairach coordinates of the peak voxel of the cluster.

| Region                               | high-value distractor LVF |             | high-value distractor RVF |             | low-value distractor LVF |             | low-value distractor RVF |             |
|--------------------------------------|---------------------------|-------------|---------------------------|-------------|--------------------------|-------------|--------------------------|-------------|
|                                      | x,y,z                     | Volume (mL) | x,y,z                     | Volume (mL) | x,y,z                    | Volume (mL) | x,y,z                    | Volume (mL) |
| right medial/middle frontal gyrus    | -16,4,49                  | 0.688       | -16,1,46                  | 0.5         |                          |             | -26,-21,29               | 0.469       |
|                                      |                           |             | -26,-19,41                | 0.609       |                          |             | -24,-9,44                | 0.406       |
|                                      |                           |             |                           |             |                          |             | -31,-31,31               | 0.281       |
| right superior frontal gyrus         |                           |             | -14,-26,44                | 0.5         |                          |             |                          |             |
| right inferior parietal lobule       | -34,31,44                 | 0.469       | -19,-36,31                | 0.313       |                          |             |                          |             |
| right precuneus                      |                           |             | -9,61,21                  | 0.594       | -19,39,49                | 0.953       | -16,56,26                | 0.438       |
|                                      |                           |             |                           |             | -14,74,39                | 0.547       |                          |             |
|                                      |                           |             |                           |             | -21,64,24                | 0.422       |                          |             |
| right visual cortex (lingual gyrus)  | -14,74,1                  | 0.531       | -11,54,4                  | 0.406       | -16,61,1                 | 0.766       | -29,59,-1                | 2.031       |
|                                      |                           |             |                           |             | -24,76,1                 | 0.422       |                          |             |
|                                      |                           |             |                           |             | -34,64,-11               | 0.438       |                          |             |
| right visual cortex (fusiform gyrus) | -24,66,-9                 | 0.297       | -36,54,-9                 | 0.25        | -48,44,-9                | 0.422       |                          |             |
| right cuneus                         |                           |             | -19,69,9                  | 0.375       |                          |             | -29,74,31                | 0.531       |
| right caudate tail                   |                           |             | -29,24,1                  | 0.25        | -19,24,6                 | 0.547       | -19,74,14                | 0.281       |
| right superior colliculus            |                           |             |                           |             | -6,29,-14                | 0.516       |                          |             |
| right temporo-parietal junction      |                           |             | -49,51,21                 | 2.375       |                          |             |                          |             |
| right inferior frontal gyrus         |                           |             | -31,-6,31                 | 0.359       |                          |             |                          |             |
| right anterior cingulate             | -24,-26,26                | 0.266       | -14,-39,19                | 0.797       |                          |             |                          |             |
| right posterior cingulate            | -29,51,21                 | 0.906       |                           |             |                          |             | -11,39,24                | 0.578       |
| right cingulate gyrus                | -16,19,36                 | 0.25        |                           |             | -14,74,39                | 0.547       | -21,41,36                | 0.703       |
|                                      |                           |             |                           |             | -11,14,31                | 0.359       |                          |             |
|                                      |                           |             |                           |             | -16,1,34                 | 0.344       |                          |             |
| right insula                         | -39,29,19                 | 0.25        |                           |             | -28,27,21                | 0.594       | -34,16,9                 | 0.281       |
| right parahippocampal gyrus          |                           |             | -29,24,-16                | 0.344       |                          |             |                          |             |
| right middle temporal gyrus          |                           |             | -46,49,-6                 | 0.266       | -46,46,6                 | 0.359       |                          |             |
| right postcentral gyrus              |                           |             |                           |             | -34,21,36                | 0.281       |                          |             |
| right superior temporal gyrus        |                           |             |                           |             | -34,54,31                | 0.266       |                          |             |

**Supplemental Table 1.** All regions of the brain demonstrating significantly greater activation in response to trials on which a valuable distractor was presented compared to distractor-absent trials, specifically when the target was presented in the visual field contralateral to the distractor. RVF = right visual field; LVF = left visual field. x,y,z refer to the Talairach coordinates of the peak voxel of the cluster.

|                                             |           |       |            |       |            |       |            |       |
|---------------------------------------------|-----------|-------|------------|-------|------------|-------|------------|-------|
| right pyramis                               |           |       | -19,64,-29 | 0.25  |            |       |            |       |
| right cerebellar tonsil                     |           |       | -9,44,-31  | 0.391 | -29,49,-36 | 0.484 | -19,49,-29 | 1.313 |
|                                             |           |       |            |       |            |       | -24,39,-29 | 0.609 |
| right culmen                                | -1,41,-24 | 0.297 |            |       | -11,44,-24 | 1.188 |            |       |
| thalamus                                    | 1,19,16   | 0.391 | -4,11,-1   | 0.359 | -1,49,-14  | 0.969 | 1,9,4      | 0.328 |
| midbrain                                    | -6,14,-21 | 0.375 |            |       |            |       |            |       |
| cerebellar nodule                           |           |       | 6,59,-29   | 0.5   |            |       | -6,61,-24  | 0.266 |
| left medial/middle frontal gyrus            |           |       | 21,-6,51   | 0.469 |            |       |            |       |
|                                             |           |       | 24,-34,36  | 0.313 |            |       |            |       |
| left precuneus                              | 14,56,49  | 0.344 | 19,69,21   | 0.375 | 11,66,19   | 0.313 |            |       |
|                                             |           |       | 11,64,36   | 0.375 |            |       |            |       |
| left visual cortex (lingual gyrus)          |           |       | 16,86,-4   | 1.078 |            |       | 26,61,-6   | 0.281 |
| left visual cortex (fusiform gyrus)         |           |       | 34,69,-11  | 0.25  | 41,14,-19  | 0.25  |            |       |
| left visual cortex (middle occipital gyrus) |           |       | 26,59,6    | 0.453 |            |       |            |       |
| left cuneus                                 |           |       | 11,71,11   | 0.266 |            |       |            |       |
| left caudate tail                           | 31,39,11  | 0.547 | 19,16,4    | 0.313 | 21,19,9    | 0.547 | 34,21,-4   | 0.391 |
| left putamen                                |           |       | 19,-4,11   | 0.359 |            |       |            |       |
| left insula                                 |           |       |            |       | 39,-6,6    | 0.313 | 31,-18,16  | 0.266 |
| left superior frontal gyrus                 | 11,-14,56 | 0.469 |            |       |            |       |            |       |
| left cingulate gyrus                        | 21,16,34  | 0.438 |            |       | 6,34,31    | 0.578 | 16,31,34   | 0.359 |
| left posterior cingulate                    | 24,49,21  | 0.281 |            |       | 16,49,9    | 0.266 |            |       |
| left middle temporal gyrus                  |           |       | 41,69,24   | 0.469 |            |       |            |       |
| left superior temporal gyrus                |           |       | 44,49,11   | 0.281 |            |       |            |       |
| left parahippocampal gyrus                  |           |       |            |       |            |       | 26,29,-16  | 0.438 |
| left cerebellar tonsil                      |           |       | 21,39,-34  | 0.734 |            |       |            |       |
| left culmen                                 |           |       |            |       | 19,41,-19  | 0.297 |            |       |
| left uvula                                  |           |       |            |       |            |       | 21,66,-24  | 0.797 |
